# Supplementary material
Source: PubMed Central journal article supplement (PMC4801511)
Supplement: NIHMS768206-supplement-1.pdf [file NIHMS768206-supplement-1.pdf]

Supplementary Materials for  
**Structure of *Saccharomyces cerevisiae* Rtr1 reveals an active site for an atypical phosphatase**

Seema Irani, S. D. Yogेशa, Joshua Mayfield, Mengmeng Zhang, Yong Zhang,  
Wendy L. Matthews, Grace Nie, Nicholas A. Prescott, Yan Jessie Zhang\*

\*Corresponding author. E-mail: jzhang@cm.utexas.edu

Published 1 March 2016, *Sci. Signal.* **9**, ra24 (2016)  
DOI: 10.1126/scisignal.aad4805

**The PDF file includes:**

- Fig. S1. Activity toward *p*NPP requires prolonged incubation with *S. cerevisiae* Rtr1.
- Fig. S2. Electrospray ionization mass spectrometry analysis of Rtr1<sub>1-213</sub> in a buffer containing phosphate.
- Fig. S3. The purification of Rtr1<sub>1-178</sub> using size exclusion chromatography.
- Fig. S4. Gel filtration profile and SDS-PAGE of Rtr1<sub>1-213</sub> mutation variants with low in vitro activity.
- Fig. S5. The presence of zinc in Rtr1<sub>1-178</sub> crystals.
- Fig. S6. Surface representation of *S. cerevisiae* Rtr1<sub>1-178</sub>.
- Fig. S7. The electron density of sulfate molecule at site 1 in the Rtr1<sub>1-178</sub> structure.
- Fig. S8. Comparison of protein folding in different phosphatases families.
- Fig. S9. Comparison of the active site of Scp1 and Rtr1.
- Table S1. Analysis of stability and activity of Rtr1 and the mutants.
- Table S2. Analysis of stability and activity of RPAP2.

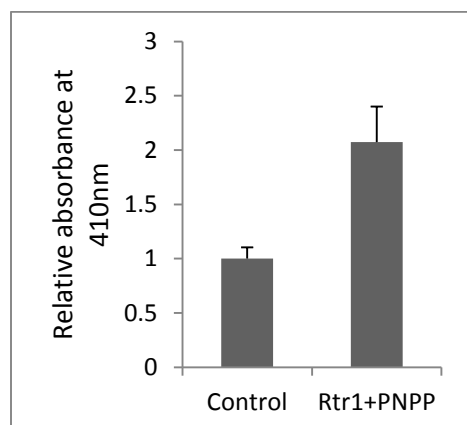

**Figure S1: Activity toward *p*NPP requires prolonged incubation with *S. cerevisiae* Rtr1.** Truncated Rtr1<sub>1-213</sub> at 28  $\mu$ M concentration was incubated with 50 mM *p*NPP for 16 hours. The OD was measured at 410 nm. The values indicate the average of three independent experiments performed in duplicate and the standard deviation is shown as error bars.

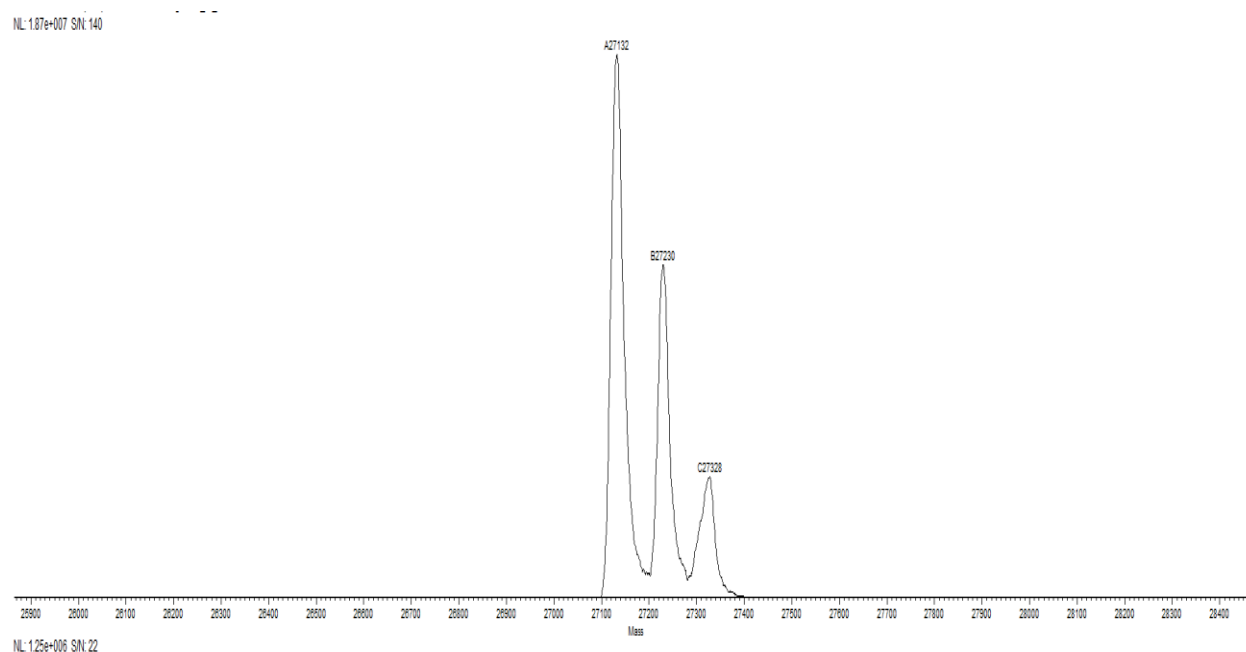

**Figure S2: Electrospray ionization mass spectrometry analysis of Rtr1<sub>1-213</sub> in a buffer containing phosphate.** Shown are the zoomed-in images of the deconvoluted peak of the proteins, which shows as a triplet peak. The left peak of 27,132 Da corresponding to Rtr1<sub>1-213</sub> (theoretical MW of 27,129 Da). The middle peak is 96 Da heavier than Rtr1<sub>1-213</sub>, which is consistent with the noncovalent association of a molecule of inorganic phosphate. The right peak is another 96 Da heavier than the middle peak, implying a second phosphate associated with Rtr1<sub>1-213</sub>.

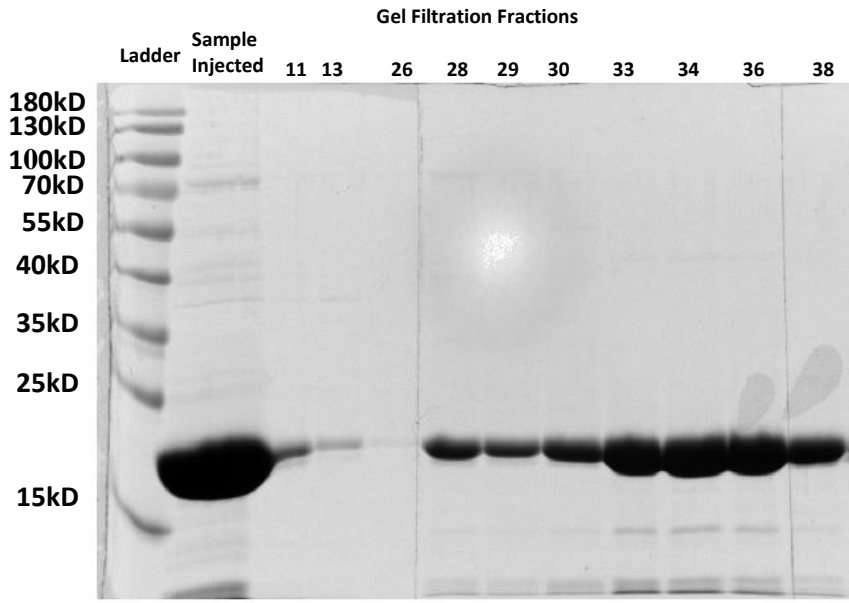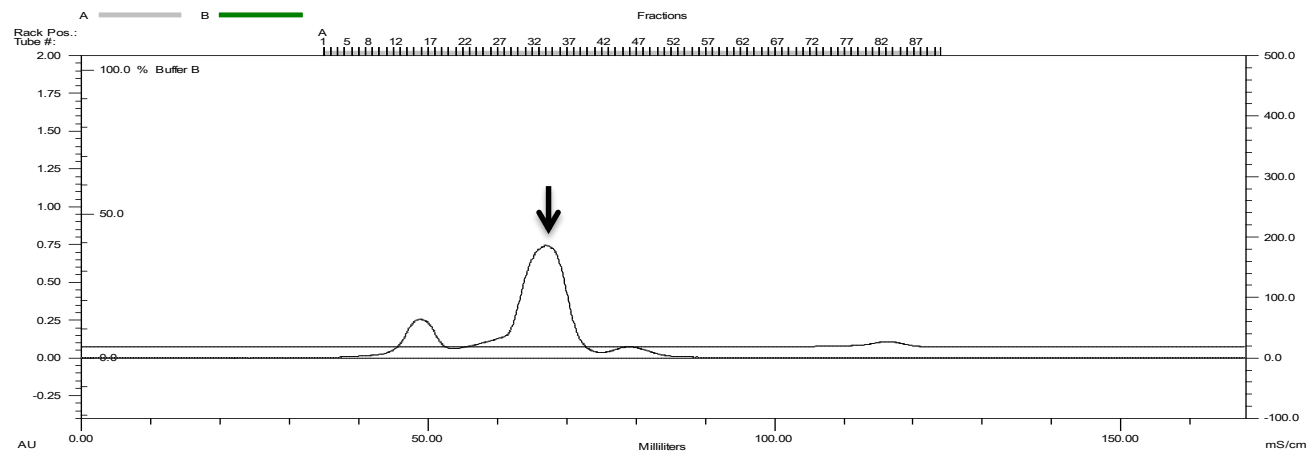

**Rtr1<sub>1-178</sub> gel filtration Profile**

**Figure S3: The purification of Rtr1<sub>1-178</sub> using size exclusion chromatography.** In SDS-gel, the sample prior to size exclusion column purification was run on the lane next to the protein standard. The other lanes are corresponding to the different elution volume for the gel filtration profile below. After purification, the fraction 30-36 were collected and used for crystallization experiment.

A

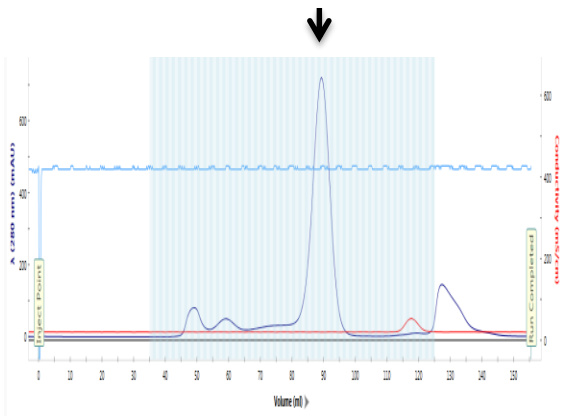

Rtr1<sub>1-213</sub> Y105A gel filtration Profile

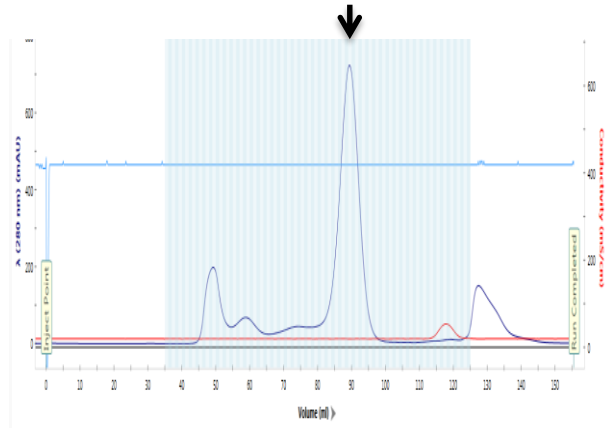

Rtr1<sub>1-213</sub> D62A gel filtration

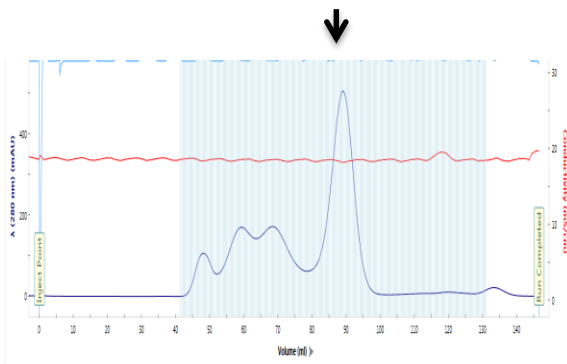

Rtr1<sub>1-213</sub> D65A gel filtration Profile

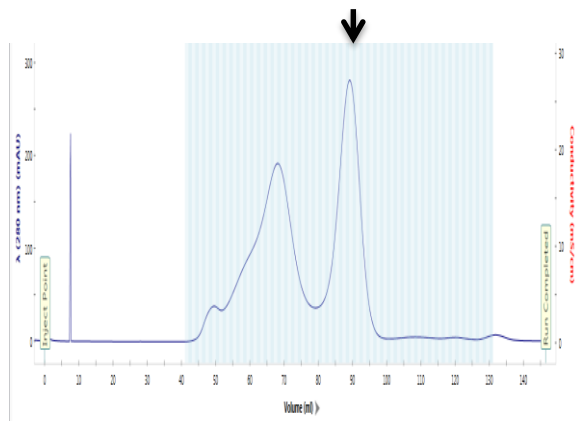

Rtr1<sub>1-213</sub> E66A gel filtration

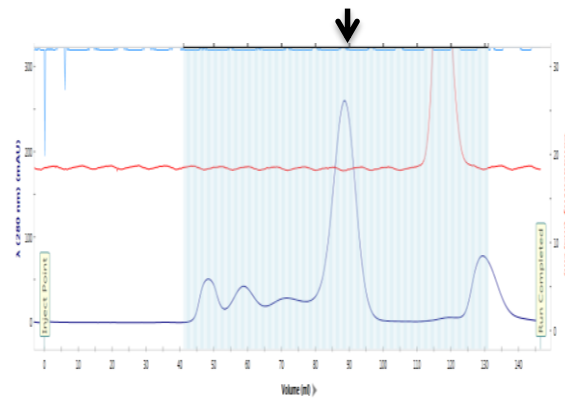

Rtr1<sub>1-213</sub> E66A gel filtration Profile

B

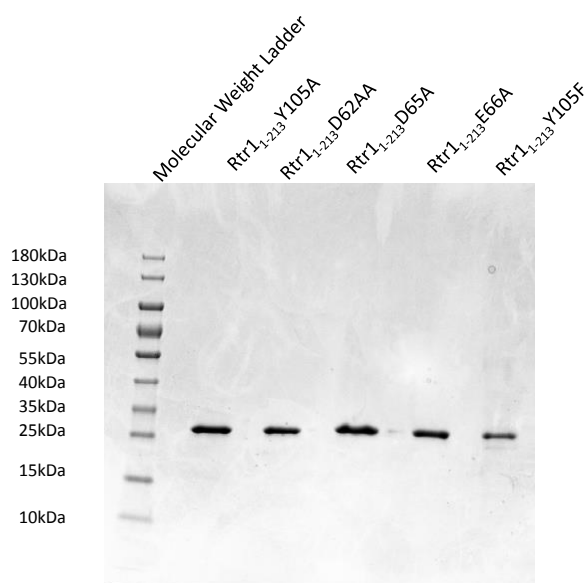

**Figure S4: Gel filtration profile and SDS-PAGE electrophoresis of Rtr1<sub>1-213</sub> mutation variants with low in vitro activity.** (A) Gel filtration results with arrows indicating the peaks that were collected during elution and used in SDS-PAGE gel in (B).

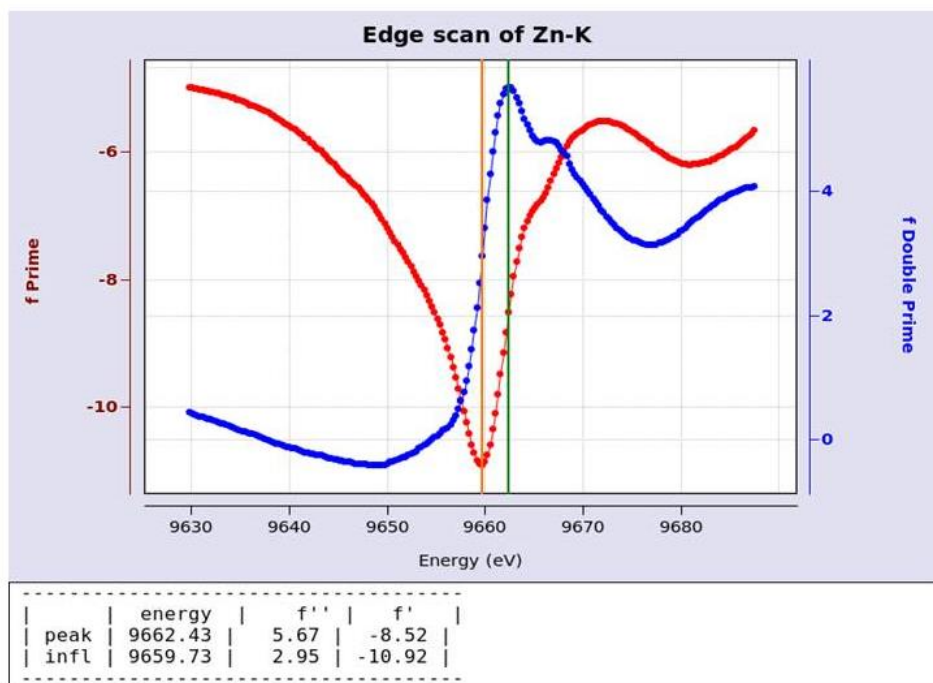

**Figure S5: The presence of zinc in Rtr1<sub>1-178</sub> crystals.** Analysis of the anomalous absorption edge at 9662.43eV in synchrotron confirmed the identity of the metal ion (zinc) in Rtr1 crystals.

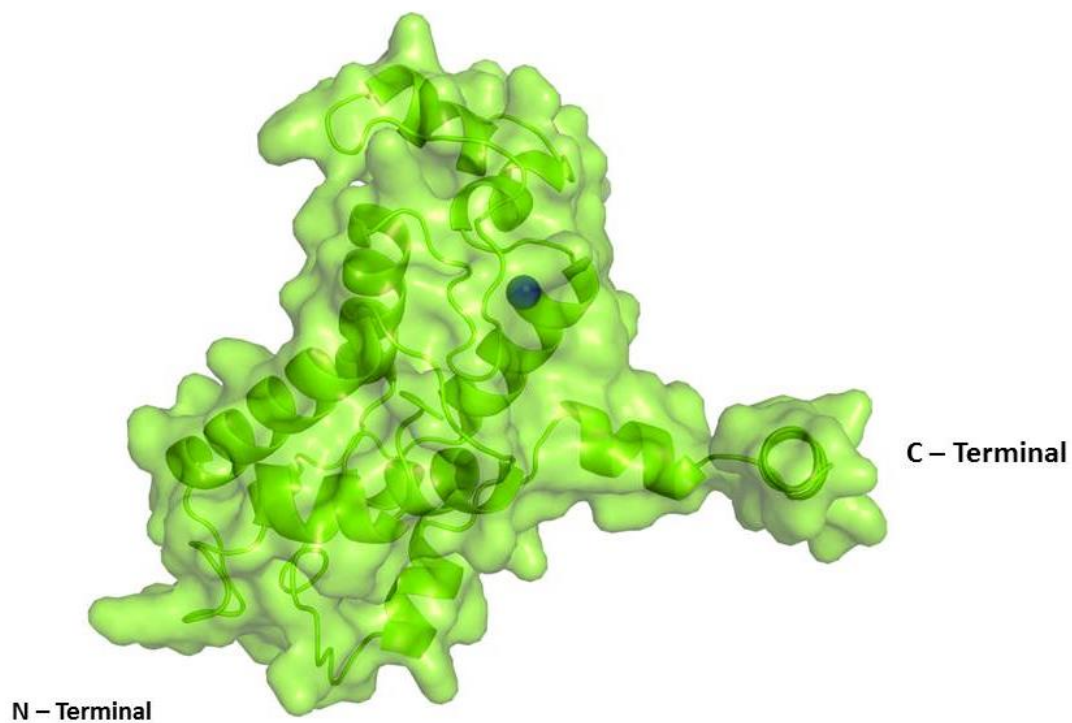

**Figure S6: Surface representation of *S. cerevisiae* Rtr1<sub>1-178</sub>.** One molecule of Rtr1<sub>1-178</sub> from the asymmetric unit. The blue ball represents a zinc ion.

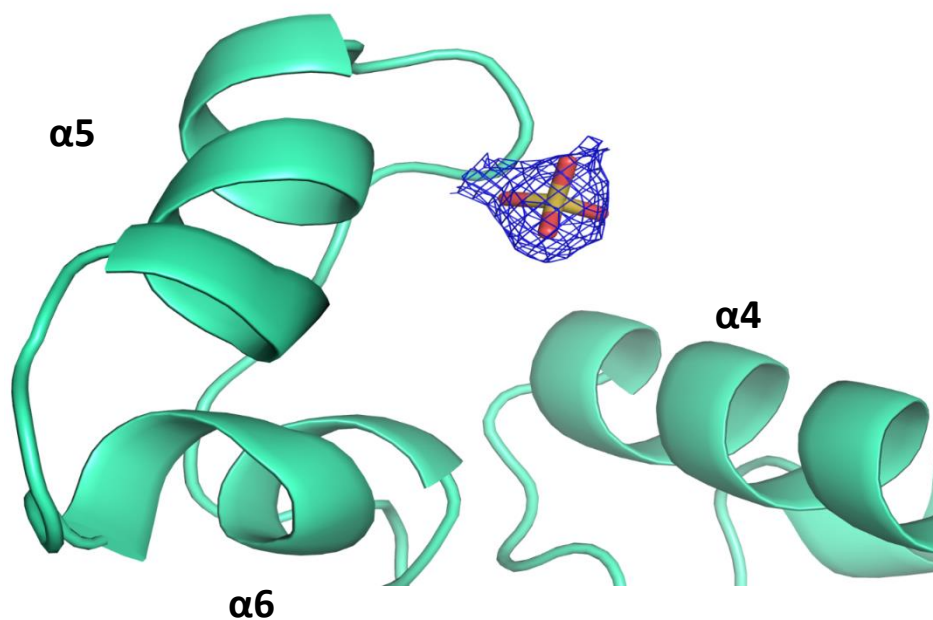

**Figure S7: The electron density of sulfate molecule at site 1 in the Rtr1<sub>1-178</sub> structure.** The blue mesh represents the 2FoFc electron density contoured to 1  $\sigma$ . A sulfate ion from crystallization mother liquor is built into the density with good fit.

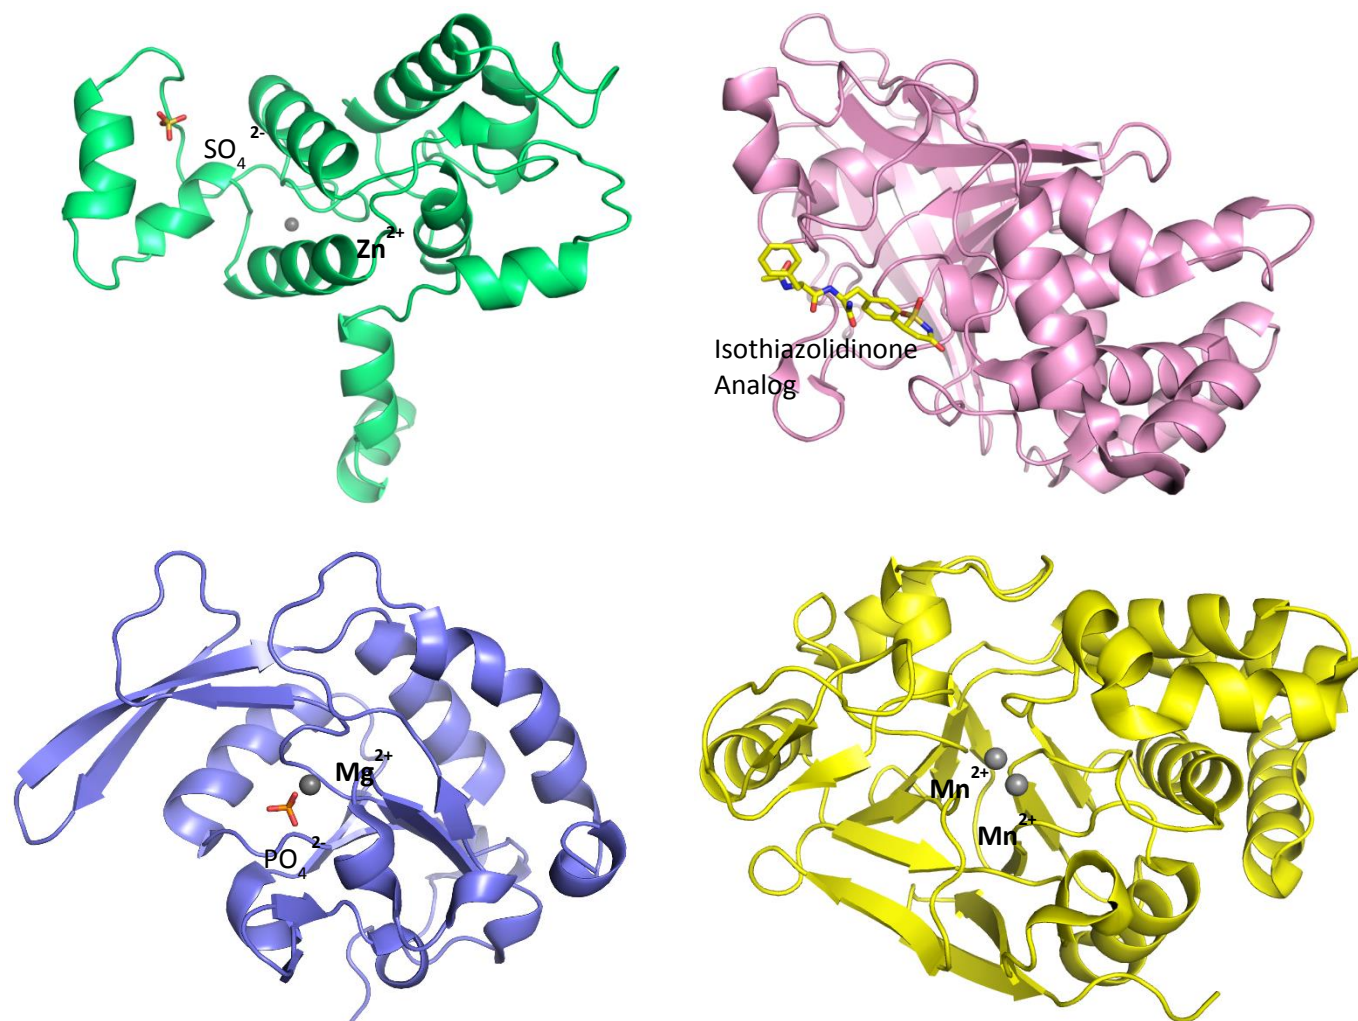

**Figure S8: Comparison of protein folding in different phosphatases families.** *S. cerevisiae* Rtr1<sub>1-178</sub> is color green with zinc ion shown as a gray sphere and sulfate ion in site 1 shown in stick representation. Cysteine-based phosphatase PTP1b (PDB ID: 2CM7) is pink with stick representation of bound inhibitor. HAD phosphatase Scp1 (PDB ID: 3LOC) is blue with Mg<sup>2+</sup> ion shown as gray sphere and phosphate shown in stick representation. The catalytic domain of the metal-dependent phosphatase PP2A (PDB ID: 2NYM) is yellow with two Mn<sup>2+</sup> ions shown as gray spheres.



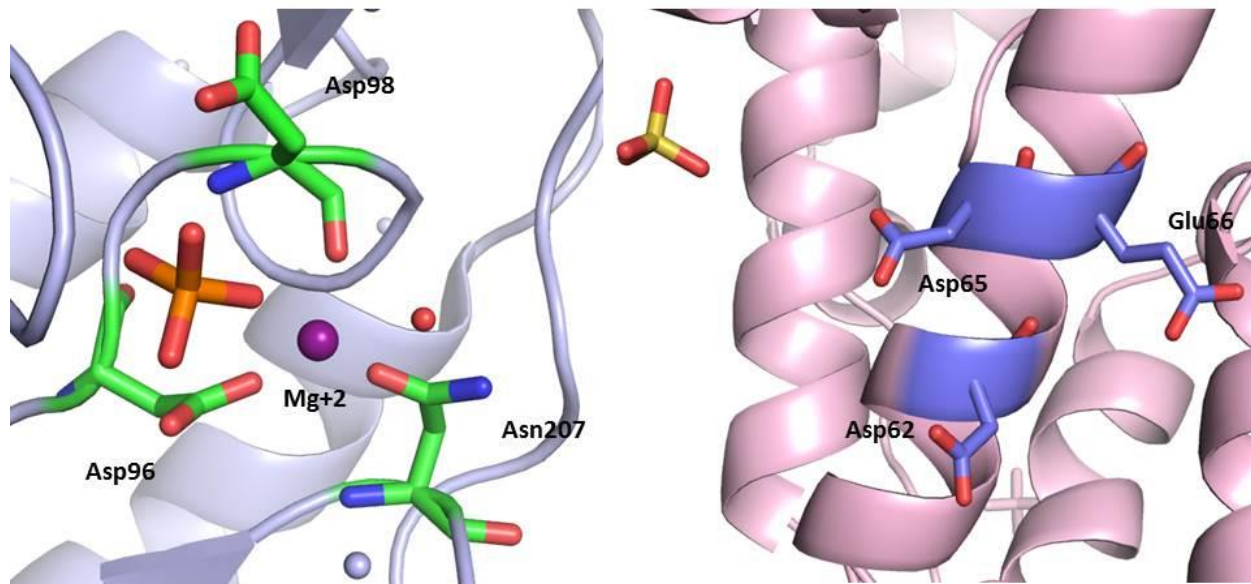

**Figure S9: Comparison of the active site of Scp1 and Rtr1.** Left shows the DXDX motif in Scp1 (PDB ID: 2GHT), which mediates phosphoryl transfer. Right shows Asp<sup>62</sup>, Asp<sup>65</sup>, and Glu<sup>66</sup> (DXXDE) in Rtr1, which are important for phosphoryl transfer.



**Table S1. Analysis of stability and activity of Rtr1 and the mutants.** NA, not applicable. Molecular weight of full-length Rtr1 is 26239 Da, Rtr1<sub>1-213</sub> is 24779 Da, and Rtr1<sub>1-178</sub> is 20853 Da.

| Protein                             | Expressed in <i>E. coli</i> | Detected as a single band of appropriate size by SDS-PAGE | Eluted at appropriate volume in gel filtration chromatography | Activity relative to that of Rtr1 <sub>1-213</sub> |
|-------------------------------------|-----------------------------|-----------------------------------------------------------|---------------------------------------------------------------|----------------------------------------------------|
| Full-length Rtr1                    | Yes                         | Yes                                                       | Yes                                                           | 32.3%                                              |
| Rtr1 <sub>1-129</sub>               | No                          | NA                                                        | NA                                                            | NA                                                 |
| Rtr1 <sub>1-137</sub>               | No                          | NA                                                        | NA                                                            | NA                                                 |
| Rtr1 <sub>1-167</sub>               | No                          | NA                                                        | NA                                                            | NA                                                 |
| Rtr1 <sub>1-178</sub>               | Yes                         | Yes                                                       | Yes                                                           | 35.8%                                              |
| Rtr1 <sub>1-213</sub>               | Yes                         | Yes                                                       | Yes                                                           | 100%                                               |
| Rtr1 <sub>1-213</sub> C73A          | No                          | NA                                                        | NA                                                            | NA                                                 |
| Rtr1 <sub>1-213</sub> C78A          | No                          | NA                                                        | NA                                                            | NA                                                 |
| Rtr1 <sub>1-213</sub> C112A         | No                          | NA                                                        | NA                                                            | NA                                                 |
| Rtr1 <sub>1-213</sub> H116A         | No                          | NA                                                        | NA                                                            | NA                                                 |
| Rtr1 <sub>1-213</sub> D62A          | Yes                         | Yes                                                       | Yes                                                           | 6.3%                                               |
| Rtr1 <sub>1-213</sub> D65A          | Yes                         | Yes                                                       | Yes                                                           | 32.8%                                              |
| Rtr1 <sub>1-213</sub> E66A          | Yes                         | Yes                                                       | Yes                                                           | 5.5%                                               |
| Rtr1 <sub>1-213</sub> Y105A         | Yes                         | Yes                                                       | Yes                                                           | 2.4%                                               |
| Rtr1 <sub>1-213</sub> F130A         | Yes                         | Yes                                                       | Yes                                                           | 78%                                                |
| Rtr1 <sub>1-213</sub> Y105F         | Yes                         | Yes                                                       | Yes                                                           | 9.5%                                               |
| Rtr1 <sub>1-213</sub> R86A          | Yes                         | Yes                                                       | Yes                                                           | 25.2%                                              |
| Rtr1 <sub>1-213</sub> K97A          | Yes                         | Yes                                                       | Yes                                                           | 28.4%                                              |
| Rtr1 <sub>1-213</sub> H110A         | Yes                         | Yes                                                       | Yes                                                           | 14.3%                                              |
| Rtr1 <sub>1-213</sub> R86AK97A      | Yes                         | Yes                                                       | Yes                                                           | 19.2%                                              |
| Rtr1 <sub>1-213</sub> R86AK97AH110A | Yes                         | Yes                                                       | Yes                                                           | 6.0%                                               |

**Table S2. Analysis of stability and activity of RPAP2.** NA, not applicable. Molecular weight of RPAP2<sub>32-274</sub> is 27,821 Da; molecular weight of RPAP2<sub>32-345</sub> is 35,696 Da.

| Protein                       | Expressed in <i>E. coli</i> | Detected as a single band of appropriate size by SDS-PAGE | Eluted at appropriate volume in gel filtration chromatography | Activity relative to that of RPAP2 <sub>32-274</sub> |
|-------------------------------|-----------------------------|-----------------------------------------------------------|---------------------------------------------------------------|------------------------------------------------------|
| RPAP2 <sub>1-345</sub>        | No                          | NA                                                        | NA                                                            | NA                                                   |
| RPAP2 <sub>32-274</sub>       | Yes                         | Yes                                                       | Yes                                                           | 100%                                                 |
| RPAP2 <sub>32-345</sub>       | Yes                         | Yes                                                       | Yes                                                           | 34.3%                                                |
| RPAP2 <sub>32-274</sub> Y127A | Yes                         | Yes                                                       | Yes                                                           | Not detected                                         |
